# Supplementary material for: Impacts of heat stress and storm events on the benthic communities of Kenting National Park (Taiwan)
Source: PeerJ. 2021 Jul 23;9:e11744. doi: 10.7717/peerj.11744 (PMC8312492; doi:10.7717/peerj.11744)
Supplement: Supplemental Information 2 [file peerj-09-11744-s002.csv]

	Date	SST.CWBbuoy	JLS_DailyMaxSST	HW_DailyMaxSST	HBH_LTER_DailyMaxSST	Temperature_HW_at_5m	Temperature_JLS_at_5m	Temperature_HBH_LTER	DailyMin_JLS	DailyMin_HW	DailyMin_HBH	DHW_JLS	DHW_HW	DHW_HBH	DHW_NOAA_SouthTW
1	8/2/2015	28.2	27.665	29.752	27.468	28.70964583	26.42685417	25.43233333	23.292	27.665	22.621	NA	NA	NA	4.6215
2	8/3/2015	28.1	27.37	29.152	28.159	28.47341667	26.370625	26.186125	23.1	27.567	22.717	NA	NA	NA	4.6215
3	8/4/2015	28.2	28.555	29.953	28.754	28.88795833	27.7916875	26.8646875	26.879	27.665	23.388	NA	NA	NA	4.6215
4	8/5/2015	28.3	28.754	29.552	28.357	28.49252083	27.8016875	26.72497917	25.125	27.567	23.773	NA	NA	NA	4.6215
5	8/6/2015	28.2	28.555	29.152	26.781	28.62647917	27.44470833	25.6534375	23.484	27.173	23.004	NA	NA	NA	4.6215
6	8/7/2015	28	27.665	29.452	28.258	28.95133333	27.20039583	27.36879167	25.416	28.357	26.488	NA	NA	NA	4.6215
7	8/8/2015	27.7	27.468	29.152	27.665	28.973875	26.090375	25.82177083	24.931	28.258	23.292	NA	NA	NA	4.6215
8	8/9/2015	27.6	27.37	28.853	28.456	28.73939583	26.15785417	27.2323125	24.835	28.456	26.292	NA	NA	NA	4.6215
9	8/10/2015	28.1	27.075	28.853	28.456	28.18810417	26.50410417	27.50220833	25.805	27.075	24.448	NA	NA	NA	4.6215
10	8/11/2015	28.7	26.292	29.452	28.953	28.847375	24.7443125	28.31020833	22.525	28.555	26.977	NA	NA	NA	4.6215
11	8/12/2015	29.2	25.222	29.652	28.953	29.2255625	24.65170833	28.08939583	22.621	28.357	26.39	NA	NA	NA	4.6215
12	8/13/2015	29.2	25.416	28.853	28.357	28.419125	24.33814583	27.5743125	22.429	27.764	25.319	NA	NA	NA	4.6215
13	8/14/2015	28.9	26.977	28.655	28.456	28.03152083	25.18133333	27.6619375	22.142	27.468	26.39	NA	NA	NA	4.6215
14	8/15/2015	29	26.292	28.159	28.258	27.58347917	24.69664583	27.52208333	21.378	26.879	26.977	NA	NA	NA	4.6215
15	8/16/2015	28.9	24.835	28.159	28.258	27.55285417	24.16520833	27.51604167	23.1	26.977	26.781	NA	NA	NA	4.6215
16	8/17/2015	28.4	26	29.152	28.555	28.49072917	25.38010417	27.82164583	24.062	26.683	27.37	NA	NA	NA	4.6215
17	8/18/2015	28.4	27.764	29.652	29.452	29.35425	26.4855625	28.97410417	24.835	29.053	28.456	NA	NA	NA	4.6215
18	8/19/2015	28.8	27.37	29.752	29.452	29.50616667	26.86947917	29.003375	24.448	29.252	27.764	NA	NA	NA	4.6215
19	8/20/2015	28.9	27.37	29.953	29.452	29.69175	27.1019375	28.94914583	26.781	29.352	28.159	NA	NA	NA	4.6215
20	8/21/2015	28.5	27.567	29.352	28.754	29.104625	27.30854167	28.14679167	26.977	28.853	27.665	NA	NA	NA	4.6215
21	8/22/2015	27.8	28.555	28.953	27.764	28.68575	28.13222917	27.20095833	27.468	28.159	26.097	NA	NA	NA	4.6215
22	8/23/2015	27.8	28.655	29.752	28.159	29.25875	28.34275	26.84529167	28.06	28.853	25.222	NA	NA	NA	4.6215
23	8/24/2015	27.5	28.456	29.652	27.075	29.44783333	28.04152083	26.18989583	27.665	29.152	24.545	NA	NA	NA	4.6215
24	8/25/2015	27.5	27.961	29.552	28.853	29.48325	27.485	27.7219375	26.488	29.252	26.781	NA	NA	NA	4.6215
25	8/26/2015	28.7	27.567	29.452	28.655	29.30620833	27.17995833	28.10241667	26.195	29.053	26.488	NA	NA	NA	4.8328
26	8/27/2015	27	28.357	29.452	28.953	28.99466667	27.56425	28.3204375	25.708	28.555	27.075	NA	NA	NA	4.8328
27	8/28/2015	27.075	27.764	28.953	28.555	28.21527083	27.26597917	27.6856875	26.292	27.173	25.319	NA	NA	NA	4.8328
28	8/29/2015	27.15	26.585	28.456	28.853	27.9576875	25.89895833	26.951875	24.931	26.781	23.773	NA	NA	NA	4.8328
29	8/30/2015	27.225	25.61	27.862	27.075	27.40710417	24.789375	25.90229167	23.1	26.292	24.062	NA	NA	NA	4.8328
30	8/31/2015	27.3	25.222	28.357	27.37	27.11716667	24.50485417	26.12289583	23.196	26	23.677	NA	NA	NA	4.8328
31	9/1/2015	28	26.292	28.754	26.977	27.308625	25.30439583	25.96647917	23.773	25.513	23.677	NA	NA	NA	4.6894
32	9/2/2015	28.4	27.862	28.456	27.567	26.861625	26.46433333	26.35170833	25.222	25.125	24.641	NA	NA	NA	4.6894
33	9/3/2015	28.3	27.764	28.754	27.272	27.547625	26.72529167	26.3235	25.125	26.097	25.125	NA	NA	NA	4.6894
34	9/4/2015	28.7	27.764	28.754	28.655	27.70839583	26.85472917	27.41316667	24.835	25.902	25.513	NA	NA	NA	4.6894
35	9/5/2015	28.8	27.37	29.352	29.152	29.017375	26.39883333	28.39820833	24.738	28.655	26.097	NA	NA	NA	4.5129
36	9/6/2015	28.6	26.488	29.452	29.053	29.13585417	24.932375	27.43758333	23.196	28.456	24.545	NA	NA	NA	4.3443
37	9/7/2015	27.7	26.488	29.053	28.655	28.20504167	25.56879167	27.91939583	24.448	27.37	25.805	NA	NA	NA	4.1581
38	9/8/2015	27.7	26.488	29.053	28.853	28.51433333	25.9071875	28.611125	24.351	27.862	28.357	NA	NA	NA	3.9935
39	9/9/2015	27.9	27.468	29.152	29.152	28.54977083	27.03258333	28.8888125	26.292	27.665	28.555	NA	NA	NA	3.8126
40	9/10/2015	28	28.754	29.252	29.152	28.65541667	27.88672917	28.835	26.977	27.665	28.555	NA	NA	NA	3.6512
41	9/11/2015	28.3	29.152	29.053	29.152	28.339125	28.640625	28.66925	28.159	27.272	28.357	NA	NA	NA	3.4562
42	9/12/2015	28.3	29.152	29.152	29.252	28.90339583	28.85764583	28.9924375	28.655	28.456	28.754	NA	NA	NA	3.2571
43	9/13/2015	28	28.754	29.352	29.053	28.88283333	28.22310417	28.81608333	27.862	27.961	28.357	NA	NA	NA	3.1064
44	9/14/2015	28.1	28.357	28.754	28.754	28.29945833	28.13225	28.56147917	27.468	27.961	28.258	NA	NA	NA	2.9312
45	9/15/2015	28.9	28.853	29.053	29.252	28.40089583	28.442	28.7564375	27.862	27.272	28.357	NA	NA	NA	2.9312
46	9/16/2015	29.2	29.252	29.452	29.352	28.4228125	28.69629167	28.75304167	27.468	26.195	25.416	NA	NA	NA	2.9312
47	9/17/2015	28.8	29.053	29.452	29.452	28.52504167	28.71689583	29.0944375	27.961	26.781	28.555	NA	NA	NA	2.7599
48	9/18/2015	28.5	29.152	29.152	29.152	28.44010417	28.75	28.69839583	28.555	27.173	27.468	NA	NA	NA	2.6161
49	9/19/2015	28.3	29.152	28.754	29.152	28.12666667	28.76270833	28.5254375	27.961	27.272	27.075	NA	NA	NA	2.4179
50	9/20/2015	28.6	28.953	28.853	28.853	28.66708333	28.71060417	28.776625	27.961	27.862	28.159	NA	NA	NA	2.2233
51	9/21/2015	29	28.754	29.252	29.252	28.943125	28.38	28.9511875	27.567	28.06	28.555	NA	NA	NA	1.9971
52	9/22/2015	29.5	29.053	29.552	29.652	29.30002083	28.535875	29.32920833	27.272	29.053	29.053	NA	NA	NA	1.7979
53	9/23/2015	29.8	29.552	30.054	29.853	29.52514583	28.7653125	29.595875	27.567	29.053	29.053	NA	NA	NA	1.7979
54	9/24/2015	29.6	29.552	29.853	29.552	29.59785417	28.714875	29.1468125	27.173	29.152	28.159	NA	NA	NA	1.6535
55	9/25/2015	29.2	29.452	29.652	29.752	29.4645	29.256375	29.27995833	28.953	29.252	27.961	NA	NA	NA	1.4587
56	9/26/2015	28.6	29.152	29.352	29.152	29.036125	28.9594375	28.60783333	28.655	28.655	27.37	NA	NA	NA	1.2753
57	9/27/2015	28.2	28.953	29.252	28.754	28.77133333	28.77877083	28.45445833	28.655	27.764	27.173	NA	NA	NA	1.0967
58	9/28/2015	27.9	28.655	28.853	28.655	28.45620833	28.023375	28.09620833	25.902	27.862	26.195	NA	NA	NA	0.9498
59	9/29/2015	27.9	26.977	28.655	27.665	28.40891667	26.587875	27.30875	25.61	26.585	26.097	NA	NA	NA	0.7708
60	9/30/2015	28.2	27.173	28.853	28.258	28.36141667	26.33220833	27.68625	24.351	27.37	26.585	NA	NA	NA	0.7708
61	10/1/2015	28.5	27.37	29.252	28.258	28.4958125	26.344875	27.75233333	24.738	27.862	25.708	NA	NA	NA	0.7708
62	10/2/2015	28.5	27.764	28.655	28.754	28.41291667	26.51316667	27.984125	24.641	28.06	25.416	NA	NA	NA	0.7708
63	10/3/2015	28.7	28.159	28.754	29.352	28.3903125	27.870875	28.8019375	27.272	27.961	28.159	NA	NA	NA	0.7708
64	10/4/2015	28.9	28.456	28.655	29.452	28.37352083	28.2353125	28.68008333	28.06	28.258	27.272	NA	NA	NA	0.7708
65	10/5/2015	28.9	28.555	28.754	28.754	28.44795833	28.2745	28.56164583	27.961	28.159	28.357	NA	NA	NA	0.5455
66	10/6/2015	28.9	28.655	28.853	28.853	28.56772917	28.28702083	28.67952083	27.665	28.357	28.555	NA	NA	NA	0.5455
67	10/7/2015	29	28.555	28.754	28.853	28.4933125	28.1348125	28.4153125	26.683	28.159	27.173	NA	NA	NA	0.5455
68	10/8/2015	29.1	28.953	28.853	29.053	28.67958333	27.84064583	28.54389583	26.879	28.555	27.567	NA	NA	NA	0.5455
69	10/9/2015	28.4	28.159	28.754	28.953	28.5699375	27.82752083	28.6320625	27.272	28.06	28.159	NA	NA	NA	0.5455
70	10/10/2015	27.5	28.555	28.456	28.754	28.27245833	28.0563125	28.52225	27.567	27.764	28.159	NA	NA	NA	0.5455
71	10/11/2015	26.4	28.357	28.853	28.456	28.51	28.3013125	28.336375	28.159	28.06	28.258	NA	NA	NA	0.5455
72	10/12/2015	25.8	28.06	28.456	28.357	28.204375	27.889125	28.2064375	27.665	27.862	27.961	NA	NA	NA	0.5455
73	10/13/2015	25.4	28.06	28.258	27.961	27.79070833	27.9136875	27.82939583	27.764	27.468	27.665	NA	NA	NA	0.5455
74	10/14/2015	25.5	28.06	27.862	27.764	27.38035417	27.8788125	27.46227083	27.567	26.879	26.977	NA	NA	NA	0.5455
75	10/15/2015	25.7	27.862	27.961	27.862	27.57295833	27.741125	27.4848125	27.468	27.272	26.977	NA	NA	NA	0.5455
76	10/16/2015	25.4	27.764	28.456	27.961	27.9655	27.57902083	27.60375	27.37	27.567	27.075	NA	NA	NA	0.5455
77	10/17/2015	25.2	27.468	28.06	27.961	27.80070833	27.24927083	27.52170833	27.075	27.567	27.075	NA	NA	NA	0.5455
78	10/18/2015	25.1	27.272	28.06	27.764	27.67345833	27.17745833	27.49914583	26.977	27.468	27.272	NA	NA	NA	0.5455
79	10/19/2015	24.8	27.272	27.961	27.665	27.7001875	27.1260625	27.47025	27.075	27.468	27.37	NA	NA	NA	0.5455
80	10/20/2015	24.4	27.075	27.961	27.468	27.632375	26.93616667	27.3045	26.683	27.37	27.075	NA	NA	NA	0.5455
81	10/21/2015	24.5	27.075	27.862	27.272	27.71245833	26.78916667	27.17754167	26.585	27.567	26.977	NA	NA	NA	0.5455
82	10/22/2015	24.8	27.075	27.961	27.37	27.71658333	26.9525	27.208125	26.781	27.468	27.075	NA	NA	NA	0.5455
83	10/23/2015	25.6	27.272	28.258	27.764	27.73735417	27.04441667	27.4684375	26.879	27.468	27.075	NA	NA	NA	0.3955
84	10/24/2015	26.1	27.567	28.258	27.567	27.97572917	27.2819375	27.22258333	26.977	27.468	26.977	NA	NA	NA	0.2113
85	10/25/2015	26.2	27.567	28.06	27.272	27.63052083	27.3309375	27.13635417	27.075	27.272	26.977	NA	NA	NA	0.2113
86	10/26/2015	26.4	27.37	27.764	27.567	27.44389583	27.25947917	27.31879167	27.075	26.879	26.879	NA	NA	NA	0.2113
87	10/27/2015	26.6	27.567	27.961	27.567	27.47875	27.37414583	27.38635417	27.075	26.879	27.272	NA	NA	NA	0.2113
88	10/28/2015	26.7	27.764	27.764	27.468	27.22520833	27.54	27.18995833	27.37	26.39	26.781	0	0	0	0.2113
89	10/29/2015	26.7	27.665	27.173	27.37	26.7955625	27.18445833	27.00397917	25.222	26.195	25.61	0	0	0	0.2113
90	10/30/2015	26.7	27.468	27.075	27.075	26.66925	27.2328125	26.41347917	26.488	25.513	24.835	0	0	0	0.2113
91	10/31/2015	26.5	27.272	27.075	27.173	26.40679167	27.077125	26.4909375	26.585	25.125	23.869	0	0	0	0.2113
92	11/1/2015	26.1	27.37	26.977	26.977	26.33739583	27.10383333	26.54272917	26.879	25.708	25.708	0	0	0	0.2113
93	11/2/2015	25.9	26.977	26.585	26.781	26.24772917	26.81366667	26.52022917	26.585	25.902	26	0	0	0	0.2113
94	11/3/2015	26.1	26.781	26.097	26.781	25.86385417	26.634125	26.52422917	26.488	25.61	26.292	0	0	0	0.2113
95	11/4/2015	26.3	26.977	26.292	26.781	26.14189583	26.85041667	26.55477083	26.585	25.708	26.292	0	0	0	0.2113
96	11/5/2015	26.3	27.075	26.488	26.879	26.31685417	26.90145833	26.6098125	26.683	26.097	26.292	0	0	0	0.2113
97	11/6/2015	27.6	27.173	26.879	27.272	26.47954167	26.95454167	26.89741667	26.781	26.097	26.585	0	0	0	0.2113
98	11/7/2015	27.6	27.468	27.37	27.567	27.10202083	27.1613125	27.32697917	26.781	26.585	27.075	0	0	0	0.2113
99	11/8/2015	27.6	27.37	27.567	27.272	27.2390625	27.1775625	26.50391667	26.879	26.781	23.773	0	0	0	0.2113
100	11/9/2015	27.1	27.468	27.665	27.272	27.4376875	27.22866667	26.46595833	26.781	27.173	24.062	0	0	0	0.2113
101	11/10/2015	26.2	27.272	27.075	27.272	26.8320625	26.86285417	26.712625	26.39	26.488	24.545	0	0	0	0.2113
102	11/11/2015	25.9	27.272	27.173	26.879	26.4516875	26.94258333	26.71372917	26.39	25.513	25.805	0	0	0	0.2113
103	11/12/2015	26.3	27.665	27.665	27.567	26.83897917	27.32710417	27.073625	27.075	26.292	26	0	0	0	0.2113
104	11/13/2015	27.1	27.961	27.665	28.159	27.08020833	27.69810417	27.76208333	26.879	26	27.272	0	0	0	0.2113
105	11/14/2015	27.1	28.06	28.258	28.258	27.52739583	27.62679167	27.92239583	26.292	25.805	27.173	0	0	0	0.2113
106	11/15/2015	26.9	27.567	28.06	28.258	27.4954375	26.8273125	27.82795833	24.545	26.879	26.781	0	0	0	0.2113
107	11/16/2015	27.1	27.764	27.173	27.862	26.91379167	27.4644375	27.4869375	26.977	26.292	27.173	0	0	0	0.2113
108	11/17/2015	27.3	27.764	26.781	27.665	25.77235417	27.33983333	26.879625	26.097	23.966	23.677	0	0	0	0.2113
109	11/18/2015	27.5	27.468	27.862	27.764	26.6295625	27.11852083	27.00847917	26.39	24.738	26.195	0	0	0	0
110	11/19/2015	27.3	27.272	27.862	28.06	27.651	26.94466667	27.88704167	26.097	27.075	27.665	0	0	0	0
111	11/20/2015	27	27.272	27.764	27.961	27.529875	27.12427083	27.76166667	26.879	27.37	27.567	0	0	0	0
112	11/21/2015	26.6	27.272	27.468	27.567	27.28604167	27.081375	27.3576875	26.781	26.977	26.977	0	0	0	0
113	11/22/2015	26.6	27.173	26.977	27.37	26.55289583	26.94841667	27.08558333	26.683	26.097	26.585	0	0	0	0
114	11/23/2015	26.1	27.075	26.977	27.075	26.6059375	26.995375	26.45179167	26.879	25.708	22.908	0	0	0	0
115	11/24/2015	25.8	26.879	26.585	26.781	26.26604167	26.72995833	26.43102083	26.585	25.805	24.641	0	0	0	0
116	11/25/2015	25	26.879	27.272	27.075	26.64310417	26.71158333	26.65491667	26.585	26	26.195	0	0	0	0
117	11/26/2015	23.2	26.683	26.781	26.879	26.19891667	26.30466667	26.3271875	25.902	25.902	25.513	0	0	0	0
118	11/27/2015	22.4	26.195	26	26.097	25.37833333	25.88622917	25.7199375	25.61	24.545	25.319	0	0	0	0
119	11/28/2015	23.3	26.292	26	26.097	25.535625	26.01595833	25.72595833	25.805	25.028	25.319	0	0	0	0
120	11/29/2015	23.8	26.195	26.097	26	25.602625	26.06885417	25.74227083	25.902	24.931	25.125	0	0	0	0
121	11/30/2015	24.4	26.195	26.195	25.902	25.657375	26.04852083	25.73395833	25.902	24.738	25.61	0	0	0	0
122	12/1/2015	24.5	26	26.292	26	25.87827083	25.84760417	25.78072917	25.708	25.125	24.835	0	0	0	0
123	12/2/2015	24.5	26	26.488	26.39	26.0733125	25.85983333	26.0446875	25.708	25.028	25.222	0	0	0	0
124	12/3/2015	23.3	25.805	26.195	26.39	25.95329167	25.67339583	25.96545833	25.319	25.708	25.708	0	0	0	0
125	12/4/2015	22.6	25.61	25.805	25.708	25.59002083	25.4584375	25.606375	25.222	25.319	25.416	0	0	0	0
126	12/5/2015	23.2	25.61	25.805	25.708	25.5476875	25.306875	25.54545833	24.931	25.222	25.416	0	0	0	0
127	12/6/2015	22.8	25.805	26.097	25.902	25.84560417	25.64895833	25.78258333	25.319	25.708	25.61	0	0	0	0
128	12/7/2015	22.4	25.319	25.902	25.61	25.63683333	25.21795833	25.2403125	24.931	25.319	24.545	0	0	0	0
129	12/8/2015	22.4	25.222	25.902	25.513	25.5901875	25.084625	25.26645833	24.835	25.222	24.931	0	0	0	0
130	12/9/2015	23.2	24.931	25.708	25.416	25.5576875	24.86479167	25.25029167	24.641	25.319	24.931	0	0	0	0
131	12/10/2015	23.6	25.222	26	25.513	25.7826875	25.05022917	25.3129375	24.931	25.513	25.125	0	0	0	0
132	12/11/2015	23.4	25.805	25.902	25.319	25.4305	25.40814583	25.03433333	24.931	24.738	23.773	0	0	0	0
133	12/12/2015	23.4	25.61	25.61	25.125	25.05683333	25.47864583	24.937375	25.125	24.158	24.545	0	0	0	0
134	12/13/2015	23.8	25.416	25.319	25.222	24.9496875	25.2705	24.89927083	25.028	24.255	24.545	0	0	0	0
135	12/14/2015	23.9	25.805	25.416	25.513	24.93783333	25.487	25.12929167	25.125	24.062	24.158	0	0	0	0
136	12/15/2015	23.4	25.416	25.319	25.416	24.6616875	25.32304167	25.0425625	25.222	23.869	24.351	0	0	0	0
137	12/16/2015	21.9	25.319	25.125	25.125	24.30564583	25.07464583	24.83275	24.738	23.773	24.158	0	0	0	0
138	12/17/2015	20.6	24.835	24.255	24.448	23.77522917	24.58689583	24.25272917	24.255	23.196	24.062	0	0	0	0
139	12/18/2015	20.4	24.641	23.966	24.255	23.70079167	24.41972917	23.97370833	24.255	23.292	23.388	0	0	0	0
140	12/19/2015	20.8	24.545	24.351	24.351	24.04595833	24.41375	24.08604167	24.158	23.677	23.869	0	0	0	0
141	12/20/2015	21.7	24.641	24.255	24.448	24.01177083	24.53870833	24.1705	24.351	23.773	23.869	0	0	0	0
142	12/21/2015	22.4	24.738	24.448	24.641	24.24870833	24.65335417	24.51233333	24.545	23.966	24.351	0	0	0	0
143	12/22/2015	23.3	25.125	24.641	24.835	24.37566667	24.84683333	24.5546875	24.545	23.966	24.351	0	0	0	0
144	12/23/2015	24	25.319	25.028	25.125	24.60916667	24.89564583	24.70602083	23.773	24.255	23.484	0	0	0	0
145	12/24/2015	24	25.416	25.319	24.738	24.55116667	24.939625	24.15602083	24.641	23.677	21.091	0	0	0	0
146	12/25/2015	23.2	25.125	25.319	24.738	24.2775	24.69785417	23.62427083	23.966	23.196	19.853	0	0	0	0
147	12/26/2015	23.5	24.835	24.351	24.545	23.38995833	24.71779167	24.07879167	24.641	21.664	21.091	0	0	0	0
148	12/27/2015	23.1	25.222	24.255	24.835	23.84945833	24.96575	24.11695833	24.738	23.004	22.429	0	0	0	0
149	12/28/2015	22	25.125	23.869	24.545	23.1705625	24.71983333	23.83789583	24.448	22.046	22.908	0	0	0	0
150	12/29/2015	21.8	24.641	24.062	23.966	23.2206875	24.35322917	23.3823125	24.158	22.621	23.004	0	0	0	0
151	12/30/2015	21.9	24.641	24.158	24.351	23.66289583	24.42185417	23.76952083	24.158	23.004	22.908	0	0	0	0
152	12/31/2015	21.5	24.351	24.062	24.351	23.723	24.17439583	24.10802083	23.966	23.292	23.773	0	0	0	0
153	1/1/2016	21.8	24.255	25.61	23.966	23.9125	23.9976875	23.79129167	23.677	22.908	23.581	0	0	0	0
154	1/2/2016	22.8	24.351	26.39	26	25.91264583	24.222625	25.11141667	24.158	25.513	23.869	0	0	0	0
155	1/3/2016	23.3	25.416	26.585	26.488	26.30270833	24.91547917	26.24364583	24.255	25.805	26	0	0	0	0
156	1/4/2016	23.5	25.222	26.683	26.195	26.28016667	24.95566667	26.04029167	24.738	25.902	25.902	0	0	0	0
157	1/5/2016	23.9	25.319	27.173	26.683	26.63447917	25.04241667	26.3758125	24.835	26.292	26	0	0	0	0
158	1/6/2016	23.86666667	25.125	27.272	26.585	26.87091667	24.6955625	26.4306875	24.545	26.488	26.097	0	0	0	0
159	1/7/2016	23.83333333	25.708	26.879	26.977	26.246	24.7023125	26.43902083	24.158	25.708	25.805	0	0	0	0
160	1/8/2016	23.8	26.292	26.879	26.977	26.33110417	25.86391667	26.51239583	25.319	25.902	26	0	0	0	0
161	1/9/2016	23.76666667	26.097	26.39	26.292	25.43904167	25.88810417	25.71208333	25.513	24.641	24.738	0	0	0	0
162	1/10/2016	23.73333333	26.585	26.585	26.781	26.10533333	26.02820833	26.2744375	25.805	25.805	25.416	0	0	0	0
163	1/11/2016	23.7	26.683	26.488	26.977	26.13589583	26.17466667	26.44964583	24.931	25.805	25.319	0	0	0	0
164	1/12/2016	23.66666667	26.39	26.39	26.781	26.158125	25.82945833	26.28647917	25.61	26	25.61	0	0	0	0
165	1/13/2016	23.63333333	26.39	26.488	26.488	25.9939375	25.95925	26.13802083	25.61	25.416	25.805	0	0	0	0
166	1/14/2016	23.6	26.292	26.195	26.39	25.67739583	26.10339583	26.06479167	25.805	25.222	25.708	0	0	0	0
167	1/15/2016	23.5	26.292	25.902	26.292	25.3496875	26.1135	25.85175	25.902	24.158	25.416	0	0	0	0
168	1/16/2016	24	26.683	26.683	26.683	26.29866667	26.39002083	26.2175	26	25.513	25.61	0	0	0	0
169	1/17/2016	24.1	26.683	26.585	26.879	26.22735417	26.45104167	26.53864583	26.292	25.902	26.292	0	0	0	0
170	1/18/2016	23.1	26.292	26.39	26.195	25.92679167	25.96520833	25.79295833	25.708	25.513	25.319	0	0	0	0
171	1/19/2016	22.5	26.097	26.292	26.292	26.219	25.6975	26.0505625	25.416	26	25.708	0	0	0	0
172	1/20/2016	23.3	26.39	26.097	26.585	25.717875	26.08097917	25.9168125	25.805	25.319	25.513	0	0	0	0
173	1/21/2016	24	26.683	26.879	26.879	26.31914583	26.32079167	26.58958333	26.097	25.61	26.292	0	0	0	0
174	1/22/2016	23.6	26.195	26.488	26.585	25.69770833	25.96535417	25.4471875	25.61	25.416	23.869	0	0	0	0
175	1/23/2016	22	25.708	25.416	25.513	24.86904167	25.12947917	24.97425	24.545	24.448	24.255	0	0	0	0
176	1/24/2016	21.5	25.416	26	25.805	25.452875	24.91754167	24.92635417	24.448	24.738	24.062	0	0	0	0
177	1/25/2016	20.7	25.416	26	26	25.67114583	25.18777083	25.47285417	24.835	25.319	25.028	0	0	0	0
178	1/26/2016	20.8	25.61	25.708	25.61	25.3635625	25.25635417	25.2765625	25.028	24.835	25.028	0	0	0	0
179	1/27/2016	22.1	25.708	25.708	25.708	24.96191667	25.33316667	25.4525	25.028	24.641	25.125	0	0	0	0
180	1/28/2016	23.3	25.513	25.319	25.416	24.8709375	25.416	25.2280625	25.222	24.545	24.931	0	0	0	0
181	1/29/2016	23.5	25.805	25.805	25.805	25.28877083	25.62466667	25.17175	25.416	24.545	24.351	0	0	0	0
182	1/30/2016	23	25.61	25.416	25.319	25.1351875	25.46045833	24.85502083	25.222	24.738	23.869	0	0	0	0
183	1/31/2016	23	25.319	25.125	25.028	24.9735625	25.1553125	24.67354167	24.931	24.738	24.351	0	0	0	0
184	2/1/2016	22.1	25.319	24.835	25.028	24.70185417	25.12922917	24.7600625	24.641	24.448	24.158	0	0	0	0
185	2/2/2016	21.6	24.931	24.545	24.641	24.1925	24.67352083	24.15445833	24.545	24.062	23.677	0	0	0	0
186	2/3/2016	21.8	24.835	24.641	24.545	24.31320833	24.71791667	24.1925625	24.545	23.966	23.869	0	0	0	0
187	2/4/2016	22.6	24.835	24.931	24.738	24.54666667	24.742125	24.544625	24.448	24.255	24.158	0	0	0	0
188	2/5/2016	22.1	24.931	24.931	24.738	24.77620833	24.69164583	24.59095833	24.545	24.641	24.351	0	0	0	0
189	2/6/2016	21.3	24.835	24.641	24.641	24.36139583	24.50641667	24.28897917	24.255	24.158	23.966	0	0	0	0
190	2/7/2016	21.3	24.545	24.448	24.351	24.0258125	24.3333125	24.03602083	24.158	23.677	23.773	0	0	0	0
191	2/8/2016	21.4	24.545	24.545	24.255	24.1905625	24.33727083	24.0118125	24.062	23.869	23.773	0	0	0	0
192	2/9/2016	21.7	24.738	24.351	24.158	24.1261875	24.53466667	24.03783333	24.351	23.773	23.773	0	0	0	0
193	2/10/2016	22.1	24.545	24.448	24.448	24.08614583	24.24870833	23.92954167	24.062	23.773	23.484	0	0	0	0
194	2/11/2016	23.4	24.641	24.448	24.545	24.220625	24.4520625	24.38375	24.062	24.062	23.581	0	0	0	0
195	2/12/2016	24.4	25.028	25.513	24.448	24.7504375	24.75010417	24.13670833	24.545	24.255	22.429	0	0	0	0
196	2/13/2016	24.4	24.931	24.738	24.641	24.36360417	24.71172917	23.71397917	24.448	23.773	22.046	0	0	0	0
197	2/14/2016	22.6	24.738	24.931	23.773	24.42822917	24.26516667	23.04245833	23.581	23.677	22.142	0	0	0	0
198	2/15/2016	20.9	23.869	24.641	23.581	23.75127083	23.58058333	22.59908333	23.388	23.1	21.855	0	0	0	0
199	2/16/2016	20.7	23.773	24.255	24.062	23.95354167	23.50664583	23.30433333	23.1	23.677	22.812	0	0	0	0
200	2/17/2016	21	24.255	24.255	23.966	24.04789583	24.074	23.71702083	23.869	23.773	23.484	0	0	0	0
201	2/18/2016	21.9	24.062	24.835	24.351	24.14660417	23.8615	23.76145833	23.581	23.677	22.717	0	0	0	0
202	2/19/2016	22.4	24.738	24.835	24.931	24.58689583	24.22479167	24.32602083	23.292	24.158	23.004	0	0	0	0
203	2/20/2016	21.4	25.125	24.641	25.416	24.232875	24.04275	24.4178125	23.581	23.388	22.429	0	0	0	0
204	2/21/2016	21.7	24.545	25.028	24.738	24.12520833	24.1484375	24.1525625	23.581	23.196	23.388	0	0	0	0
205	2/22/2016	23	24.931	25.028	25.125	24.73795833	24.68558333	24.84479167	24.158	23.966	24.351	0	0	0	0
206	2/23/2016	22.1	24.931	25.028	25.125	24.76814583	24.61514583	24.90308333	24.351	24.448	24.641	0	0	0	0
207	2/24/2016	21.1	24.448	24.448	24.641	24.0260625	24.18435417	24.27497917	23.869	23.484	23.966	0	0	0	0
208	2/25/2016	15.3	24.255	24.448	23.869	23.83539583	24.05195833	23.817	23.677	23.196	23.677	0	0	0	0
209	2/26/2016	15.3	24.835	24.448	24.835	23.99791667	24.41402083	24.33985417	23.773	23.677	23.677	0	0	0	0
210	2/27/2016	16.4	25.125	24.545	24.835	24.08616667	24.86685417	24.65133333	24.641	23.292	24.448	0	0	0	0
211	2/28/2016	17.2	24.835	23.966	24.545	23.82720833	24.67766667	24.20489583	24.448	23.677	23.484	0	0	0	0
212	2/29/2016	16.8	24.738	24.062	24.448	23.80345833	24.5044375	23.84733333	23.966	22.908	23.292	0	0	0	0
213	3/1/2016	16.6	24.158	24.448	24.351	23.70125	24.0239375	23.55485417	23.869	22.908	22.908	0	0	0	0
214	3/2/2016	17.2	24.545	24.448	24.448	24.2769375	24.18470833	24.293	23.677	24.062	24.158	0	0	0	0
215	3/3/2016	17.3	24.545	24.931	24.641	24.6353125	24.45614583	24.29316667	24.255	24.255	23.966	0	0	0	0
216	3/4/2016	22.2	24.738	25.028	24.738	24.77820833	24.53064583	24.675625	24.351	24.448	24.545	0	0	0	0
217	3/5/2016	21.6	24.835	24.738	24.738	24.37352083	24.64520833	24.4540625	24.448	24.062	23.966	0	0	0	0
218	3/6/2016	20.6	24.835	25.319	24.931	24.65183333	24.52645833	24.388	24.351	23.773	23.581	0	0	0	0
219	3/7/2016	20.8	24.835	25.902	25.61	25.40210417	24.51658333	25.34325	24.255	24.931	24.931	0	0	0	0
220	3/8/2016	20.1	25.416	25.61	26	25.06504167	24.88525	25.67729167	24.255	24.448	25.319	0	0	0	0
221	3/9/2016	20.8	24.545	25.61	25.902	25.00227083	24.37358333	24.9985625	24.062	24.545	24.448	0	0	0	0
222	3/10/2016	21.7	24.158	24.835	24.835	24.24754167	24.00589583	24.38164583	23.869	22.812	23.869	0	0	0	0
223	3/11/2016	22.6	24.931	25.125	24.738	24.5028125	24.126625	24.54066667	23.484	22.908	24.255	0	0	0	0
224	3/12/2016	23.3	24.931	25.319	25.125	24.748125	24.70985417	24.80252083	24.351	24.351	24.545	0	0	0	0
225	3/13/2016	22.9	25.513	25.028	25.416	24.66558333	25.11102083	25.03458333	24.351	23.773	23.869	0	0	0	0
226	3/14/2016	22.4	25.513	24.835	24.835	23.6865	24.96189583	24.134625	24.545	21.76	23.484	0	0	0	0
227	3/15/2016	23	24.641	24.062	24.255	23.73708333	24.4399375	23.8775	24.255	22.812	22.908	0	0	0	0
228	3/16/2016	23.1	25.125	25.319	25.028	24.36791667	24.81247917	24.38191667	24.351	23.581	23.773	0	0	0	0
229	3/17/2016	22.5	25.125	25.319	24.835	24.82883333	24.86483333	24.53872917	24.641	24.255	23.677	0	0	0	0
230	3/18/2016	21.1	25.319	25.222	25.222	24.81860417	25	24.63379167	24.738	24.448	23.484	0	0	0	0
231	3/19/2016	21.2	24.931	24.931	25.125	24.74997917	24.48220833	23.4234375	24.062	24.351	22.142	0	0	0	0
232	3/20/2016	20.8	24.738	24.931	23.966	24.02027083	24.5789375	23.69889583	24.351	23.004	23.292	0	0	0	0
233	3/21/2016	20.4	24.448	24.738	24.448	24.41995833	24.37329167	23.92770833	24.255	23.966	23.196	0	0	0	0
234	3/22/2016	20.3	25.222	25.125	25.125	24.81464583	24.65958333	24.31827083	24.255	24.448	23.004	0	0	0	0
235	3/23/2016	21.4	25.902	25.125	25.028	24.78433333	25.25452083	24.51891667	24.931	24.255	23.292	0	0	0	0
236	3/24/2016	21.9	25.222	24.931	24.641	24.20527083	24.73610417	23.70364583	24.158	23.196	22.621	0	0	0	0
237	3/25/2016	22.3	24.255	24.351	24.545	23.80327083	24.11625	24.08020833	23.966	23.292	23.196	0	0	0	0
238	3/26/2016	22.8	24.255	24.545	24.158	24.2729375	24.03602083	23.89954167	23.869	23.773	23.677	0	0	0	0
239	3/27/2016	23.7	24.351	24.835	24.448	24.2490625	24.11620833	23.89354167	23.773	23.677	23.484	0	0	0	0
240	3/28/2016	24.3	24.448	24.835	24.351	24.506375	24.20064583	23.88960417	23.773	24.158	23.484	0	0	0	0
241	3/29/2016	24.7	24.545	24.931	24.158	24.46445833	24.2890625	23.845375	23.869	23.869	23.388	0	0	0	0
242	3/30/2016	25.3	24.738	25.416	24.448	24.78091667	24.42377083	23.88158333	24.158	23.966	23.388	0	0	0	0
243	3/31/2016	25.7	24.738	25.708	24.545	25.31129167	24.57285417	24.22095833	24.448	24.835	23.388	0	0	0	0
244	4/1/2016	26.4	24.738	25.708	24.545	25.38791667	24.639375	24.2430625	24.448	24.931	23.484	0	0	0	0
245	4/2/2016	25.6	25.222	26.195	25.416	25.71422917	24.861	24.88739583	24.448	25.125	24.255	0	0	0	0
246	4/3/2016	24.8	25.513	26.097	25.513	25.71202083	25.27858333	25.03658333	25.125	25.222	24.062	0	0	0	0
247	4/4/2016	24.5	25.319	26.097	25.319	25.6874375	25.09670833	24.869125	24.931	25.319	23.966	0	0	0	0
248	4/5/2016	24.7	25.902	26	25.028	25.59233333	25.1921875	24.69585417	24.641	25.028	23.388	0	0	0	0
249	4/6/2016	24.5	26	26.097	25.319	25.61270833	25.56997917	24.81070833	24.931	25.028	23.773	0	0	0	0
250	4/7/2016	23.9	26.292	26.39	25.125	25.66954167	25.62547917	24.63154167	23.773	24.835	23.388	0	0	0	0
251	4/8/2016	23.7	25.319	26.39	24.931	26.14814583	24.89122917	23.82920833	24.255	25.61	21.951	0	0	0	0
252	4/9/2016	24.6	24.931	26.683	23.677	26.13391667	24.58895833	23.0109375	23.966	25.708	21.76	0	0	0	0
253	4/10/2016	24.8	26.097	26.39	24.448	25.94095833	25.13245833	23.44704167	22.908	25.513	22.333	0	0	0	0
254	4/11/2016	25.8	25.319	26.195	24.641	25.8070625	24.65389583	23.73375	23.1	25.513	22.333	0	0	0	0
255	4/12/2016	24.7	25.805	26.977	24.351	25.93729167	25.18614583	23.74541667	23.966	25.416	22.429	0	0	0	0
256	4/13/2016	24.9	25.125	26.488	24.641	25.919	24.27627083	23.67358333	22.908	25.222	22.429	0	0	0	0
257	4/14/2016	25.7	24.545	26.292	23.966	26.0789375	23.77960417	22.967125	22.621	25.805	21.951	0	0	0	0
258	4/15/2016	26.3	25.222	27.173	24.351	26.72220833	24.70616667	23.44547917	23.1	26	21.855	0	0	0	0
259	4/16/2016	25.9	25.902	27.075	24.931	26.7851875	25.03683333	24.09014583	24.351	26.488	21.76	0	0	0	0
260	4/17/2016	25.8	25.61	29.652	25.416	26.90758333	24.87341667	24.14710417	23.773	26.585	21.855	0	0	0	0
261	4/18/2016	25.5	25.61	28.357	25.319	27.7210625	25.14129167	24.80052083	24.545	27.272	24.351	0	0	0	0
262	4/19/2016	25.4	24.931	27.567	24.835	26.912	24.78833333	24.31152083	24.545	26.488	23.869	0	0	0	0
263	4/20/2016	25.8	25.416	27.468	26.097	26.96516667	25.11927083	25.2245	24.835	26.39	24.545	0	0	0	0
264	4/21/2016	25.2	26.683	28.159	25.805	27.651625	25.88872917	25.37583333	25.222	26.977	24.641	0	0	0	0
265	4/22/2016	23.7	26	28.357	25.708	28.09302083	25.30983333	24.43935417	23.581	27.764	22.333	0	0	0	0
266	4/23/2016	23.3	26.39	28.456	24.931	28.13429167	25.195	23.64164583	23.484	27.665	22.142	0	0	0	0
267	4/24/2016	24	25.902	28.456	24.931	28.28070833	24.73404167	23.9489375	22.429	27.764	22.333	0	0	0	0
268	4/25/2016	24.9	25.61	28.258	24.545	28.088875	24.47483333	23.69520833	23.196	27.862	22.908	0	0	0	0
269	4/26/2016	25.7	27.075	28.456	25.416	28.09725	25.4795	24.70841667	24.158	27.468	23.004	0	0	0	0
270	4/27/2016	25.8	25.902	28.853	25.805	28.58439583	25.26158333	24.91677083	23.966	28.159	22.333	0	0	0	0
271	4/28/2016	25.6	25.222	28.555	25.61	28.132375	25.06239583	24.7185625	24.738	27.468	23.196	0	0	0	0
272	4/29/2016	26.5	25.513	27.862	25.319	26.759	24.97177083	24.4944375	24.641	26.39	24.062	0	0	0	0
273	4/30/2016	26.2	26	27.961	26.879	27.47720833	25.590375	26.01433333	25.125	26.39	24.351	0	0	0	0
274	5/1/2016	26.3	26.195	28.159	27.272	27.65310417	25.92277083	26.584375	25.708	27.272	25.416	0	0	0	0
275	5/2/2016	26.8	26.879	28.655	26.879	28.0833125	26.53260417	26.19514583	26.195	27.567	25.416	0	0	0	0
276	5/3/2016	26.7	26.683	28.754	26.195	28.5140625	26.10685417	25.39527083	23.581	28.357	23.484	0	0	0	0
277	5/4/2016	25.7	26.683	29.152	25.61	28.60120833	26.11185417	24.76289583	25.513	28.258	23.484	0	0	0	0
278	5/5/2016	24.9	27.862	28.853	26.292	28.19820833	27.27020833	25.21372917	25.805	27.862	23.292	0	0	0	0
279	5/6/2016	25.3	28.357	29.452	26.781	28.79039583	26.7455625	25.46708333	24.351	27.961	23.388	0	0	0	0
280	5/7/2016	26.1	27.567	29.352	26.39	28.84552083	25.89804167	25.50039583	24.062	28.258	23.869	0	0	0	0
281	5/8/2016	26.8	26.488	29.053	27.567	28.61975	25.42479167	26.36877083	22.908	28.159	25.319	0	0	0	0
282	5/9/2016	26	26.977	29.152	28.655	28.758375	25.7014375	26.7840625	23.869	28.258	22.812	0	0	0	0
283	5/10/2016	26.1	26.683	29.352	25.708	29.00729167	25.62191667	24.60152083	23.869	28.456	22.333	0	0	0	0
284	5/11/2016	26.7	25.805	29.252	25.125	28.61839583	25.32716667	24.48720833	24.931	27.468	22.429	0	0	0	0
285	5/12/2016	26.85	26.292	28.456	27.961	28.05820833	25.74872917	26.49179167	25.028	27.468	24.448	0	0	0	0
286	5/13/2016	27	26.781	29.053	27.37	28.89908333	26.27827083	26.85935417	25.902	28.655	25.319	0	0	0	0
287	5/14/2016	26.6	28.357	29.152	28.159	28.9841875	27.4186875	27.58420833	26.683	28.655	26.781	0	0	0	0
288	5/15/2016	26.5	28.655	29.352	28.754	29.042375	28.46435417	28.18808333	28.159	28.555	27.567	0	0	0	0
289	5/16/2016	26.7	28.853	29.352	28.953	28.94072917	27.9320625	28.18191667	26.585	28.456	27.468	0	0	0	0
290	5/17/2016	26.6	27.961	28.555	27.961	28.29925	27.56075	27.2948125	27.075	28.06	26.585	0	0	0	0
291	5/18/2016	26.4	28.159	29.452	28.159	28.82747917	27.78845833	27.44489583	27.665	28.159	25.902	0	0	0	0
292	5/19/2016	26.8	28.853	29.552	28.853	29.10691667	28.35141667	28.02170833	27.665	28.555	26.879	0	0	0	0
293	5/20/2016	27.4	28.754	29.252	28.456	28.9675	28.51808333	28.00814583	28.357	28.754	25.805	0	0	0	0
294	5/21/2016	27.6	28.357	28.953	28.06	28.77683333	28.258	27.58622917	28.159	28.555	25.805	0	0	0	0
295	5/22/2016	27.2	28.357	29.053	28.456	28.81414583	28.07304167	27.57739583	26	28.655	24.545	0	0	0	0
296	5/23/2016	26.9	28.456	29.152	28.159	28.97997917	27.77514583	27.106875	26.488	28.853	24.738	0	0	0	0
297	5/24/2016	26.9	28.258	29.352	27.862	29.0215	27.39383333	26.84920833	25.805	28.655	24.062	0	0	0	0
298	5/25/2016	26.6	28.06	29.053	28.06	28.75816667	26.97741667	26.7958125	25.028	28.555	24.738	0	0	0	0
299	5/26/2016	26	28.655	29.452	29.152	28.9118125	27.21308333	27.62989583	23.773	28.357	25.319	0	0	0	0
300	5/27/2016	26	28.357	29.752	29.252	29.043	27.01935417	28.53810417	25.902	28.06	26	0	0	0	0
301	5/28/2016	26.1	27.862	30.054	28.258	29.49645833	26.689625	27.12635417	22.908	27.37	23.773	0	0.000489796	0	0
302	5/29/2016	26.5	26.39	30.154	27.961	29.796375	24.91397917	27.05929167	22.812	29.452	26.39	0	0.000979592	0	0
303	5/30/2016	26.6	25.708	30.054	28.06	29.365625	24.65108333	27.31545833	22.812	27.862	26.097	0	0.001469388	0	0
304	5/31/2016	26.8	26.781	29.552	28.555	29.10710417	25.3525625	27.35675	24.351	28.357	24.448	0	0.001959184	0	0
305	6/1/2016	26.7	26.488	29.352	28.159	28.7816875	24.94433333	26.61527083	23.292	26.977	23.677	0	0.00244898	0	0
306	6/2/2016	26.3	27.173	29.053	27.764	28.28541667	25.67452083	26.35177083	24.351	27.272	21.569	0	0.002938776	0	0
307	6/3/2016	25.9	27.173	29.352	28.159	28.64941667	25.5964375	26.9158125	23.966	27.272	23.966	0	0.003428571	0	0
308	6/4/2016	25	26.292	29.352	29.352	28.91414583	25.51633333	27.16026389	23.773	27.961	24.895	0	0.003428571	0	0
309	6/5/2016	25	26.585	29.252	28.593	28.60133333	25.77895833	27.31604167	25.125	27.468	23.833	0	0.003428571	0	0
310	6/6/2016	24.9	27.862	28.953	29.115	28.07002083	26.18433333	27.96332292	23.581	26.488	24.05	0	0.003428571	0	0
311	6/7/2016	24.9	27.272	29.252	28.965	28.54191667	26.6655	27.29108333	25.319	27.075	23.665	0	0.003428571	0	0
312	6/8/2016	25.6	27.173	29.152	29.565	28.70241667	26.19004167	28.1155625	23.388	28.258	25.623	0	0.003428571	0	0
313	6/9/2016	26.3	27.764	29.252	29.29	29.01108333	25.950625	28.50409375	23.004	28.555	26.646	0	0.003428571	0	0
314	6/10/2016	26.4	26.977	29.152	28.742	28.45052083	26.01764583	28.03142708	23.966	27.567	25.453	0	0.003428571	0	0
315	6/11/2016	26.9	26.097	28.655	28.568	28.398375	25.48616667	27.795375	23.388	27.764	25.72	0	0.003428571	0	0
316	6/12/2016	27.4	26.292	28.853	28.32	28.33677083	24.80927083	27.22261458	22.717	27.468	24.388	0	0.003428571	0	0
317	6/13/2016	27.4	24.835	28.555	28.147	28.2559375	23.90058333	26.79154167	21.855	28.06	25.258	0	0.003428571	0	0
318	6/14/2016	27.7	24.448	28.853	27.924	28.41110417	23.6951875	26.99892708	22.812	27.567	25.283	0	0.003428571	0	0
319	6/15/2016	27.9	24.351	29.752	28.221	28.87154167	23.81539583	27.66645833	23.004	27.468	24.581	0	0.003428571	0	0
320	6/16/2016	28.1	25.222	29.853	28.369	29.22366667	24.30783333	27.22628125	22.717	28.06	23.352	0	0.003428571	0	0
321	6/17/2016	28.2	25.902	29.953	28.742	29.26320833	24.20429167	26.92733333	22.717	28.06	23.088	0	0.003428571	0	0
322	6/18/2016	28.3	26.781	29.752	29.84	28.91852083	25.1118125	27.98564583	23.484	27.468	23.617	0	0.003428571	0	0
323	6/19/2016	28.4	26.879	29.452	29.59	28.95995833	26.20947917	29.11488542	25.319	27.862	26.916	0	0.003428571	0	0
324	6/20/2016	28.3	26.977	29.552	29.79	29.03079167	26.3724375	29.16705208	24.738	28.06	28.593	0	0.003428571	0	0
325	6/21/2016	28.3	26.977	29.752	30.066	29.30477083	25.74702083	28.57827083	23.484	28.456	26.109	0	0.003428571	0	0.1868
326	6/22/2016	28.4	28.953	30.054	30.041	29.18027083	26.16575	28.78979167	22.812	28.159	25.647	0	0.003428571	0.013632653	0.3903
327	6/23/2016	28.6	26.781	29.853	30.798	29.0120625	25.31222917	29.20432292	22.238	27.862	25.866	0	0.003428571	0.03522449	0.5965
328	6/24/2016	28.3	26.977	29.953	30.52	29.385625	25.8778125	29.36788542	24.062	28.754	25.404	0	0.01422449	0.06477551	0.8495
329	6/25/2016	28.2	27.567	30.659	30.52	29.73329167	26.08435417	29.3845	22.908	28.06	27.112	0	0.035816327	0.105897959	1.0796
330	6/26/2016	28.2	28.555	30.659	30.697	29.90902083	25.91720833	29.06632292	22.238	27.37	24.653	0	0.064081633	0.147020408	1.2942
331	6/27/2016	27.6	27.665	30.457	30.066	29.9015625	27.122875	29.43605208	25.61	28.853	28.048	0	0.099020408	0.200755102	1.5389
332	6/28/2016	27	28.258	30.457	30.748	30.13983333	27.12372917	30.128875	24.931	29.552	27.825	0	0.146816327	0.27122449	1.7836
333	6/29/2016	26.7	28.953	30.76	30.95	30.52854167	27.61560417	30.4416875	25.222	30.154	29.69	0	0.20955102	0.339122449	1.9858
334	6/30/2016	26.4	29.053	30.862	30.672	30.45979167	27.79616667	30.05553125	23.484	28.853	28.742	0	0.278959184	0.402897959	2.1885
335	7/1/2016	25.3	29.352	30.457	30.318	30.23864583	28.52964583	29.72027083	26.39	29.152	27.333	0	0.346306122	0.458714286	2.3506
336	7/2/2016	24.7	29.352	30.558	30.117	30.02760417	28.40666667	29.51078125	25.902	29.053	27.505	0.00255102	0.409530612	0.511428571	2.5622
337	7/3/2016	24.2	30.255	30.457	30.545	29.809125	27.98302083	29.69509375	24.931	29.152	28.32	0.005102041	0.468632653	0.574163265	2.7996
338	7/4/2016	24.2	29.452	30.255	30.621	29.45741667	28.60283333	29.93560417	26.488	27.764	28.097	0.020510204	0.52155102	0.633795918	3.0495
339	7/5/2016	23.9	30.76	30.154	30.596	29.73404167	29.4995625	30.10707292	28.953	29.053	27.825	0.036408163	0.561612245	0.68877551	3.2921
340	7/6/2016	24.5	30.154	29.853	30.722	29.55416667	29.6950625	30.08359375	27.567	28.953	29.715	0.052306122	0.591346939	0.73344898	3.5005
341	7/7/2016	24.8	29.652	30.356	30.167	30.06854167	29.16541667	29.80163542	27.764	29.552	29.14	0.068204082	0.614897959	0.774285714	3.673
342	7/8/2016	25	29.152	30.154	29.815	29.85695833	28.1135	28.55889583	26.585	29.552	25.963	0.084102041	0.629714286	0.815122449	3.673
343	7/9/2016	25	27.961	29.853	29.59	29.50827083	27.5136875	29.06920833	26.488	29.252	28.568	0.09744898	0.637857143	0.847489796	3.673
344	7/10/2016	25.1	27.567	29.252	29.215	29.09614583	27.04475	28.96158333	26.292	28.853	27.949	0.110795918	0.64344898	0.869836735	3.673
345	7/11/2016	25.2	26.977	29.352	29.09	29.10247917	26.73816667	28.63403125	26.488	28.853	28.048	0.111285714	0.64855102	0.882673469	3.673
346	7/12/2016	25.1	26.488	29.352	28.916	29.14204167	25.56839583	28.52384375	24.545	28.754	27.53	0.111285714	0.653653061	0.883428571	3.673
347	7/13/2016	25.6	25.708	29.552	29.04	29.10247917	24.8915	28.34478125	23.966	28.853	25.016	0.111285714	0.654142857	0.883428571	3.673
348	7/14/2016	25.9	25.708	29.752	29.14	29.32295833	24.83714583	28.53954167	23.966	28.953	26.036	0.111285714	0.654142857	0.883428571	3.673
349	7/15/2016	25.9	25.125	30.054	29.115	29.65441667	24.51670833	28.16927083	23.677	29.252	24.363	0.111285714	0.654142857	0.883428571	3.673
350	7/16/2016	25.7	26.977	30.054	29.065	29.75875	26.3138125	28.36025	24.545	29.252	25.162	0.111285714	0.654142857	0.883428571	3.8322
351	7/17/2016	25.8	27.764	29.953	29.04	29.66275	26.7188125	27.74389583	25.805	29.152	23.954	0.111285714	0.656693878	0.883428571	4.0091
352	7/18/2016	26.1	27.665	30.255	29.389	29.60308333	26.5785	28.11282292	24.835	28.853	24.146	0.111285714	0.663857143	0.883428571	4.172
353	7/19/2016	26.6	27.961	30.356	29.414	29.8575	26.55891667	27.73891667	24.351	29.053	23.881	0.111285714	0.679755102	0.883428571	4.3899
354	7/20/2016	27	27.665	30.558	29.439	29.85979167	26.26966667	27.28351042	21.951	29.053	22.369	0.111285714	0.712653061	0.883428571	4.6186
355	7/21/2016	26.9	29.053	30.963	30.016	30.2269375	26.35102083	28.26123958	23.388	28.754	23.785	0.111285714	0.760489796	0.883428571	4.8377
356	7/22/2016	26.5	28.06	30.862	29.966	30.18222917	26.77472917	28.45130208	25.513	29.152	24.146	0.111285714	0.815	0.883428571	5.0598
357	7/23/2016	26.6	27.665	30.457	29.69	29.89341667	26.92108333	28.30408333	25.513	28.853	26.158	0.111285714	0.88444898	0.883428571	5.3424
358	7/24/2016	26.7	28.06	30.862	29.941	30.08183333	27.026375	28.80979167	25.125	28.456	26.916	0.111285714	0.966285714	0.890877551	5.6182
359	7/25/2016	26.3	28.853	30.862	30.495	30.17397917	28.14354167	29.10058333	27.075	29.452	24.532	0.111285714	1.056367347	0.903714286	5.8704
360	7/26/2016	26.5	29.352	30.76	30.394	30.05960417	28.6695	29.65372917	27.961	28.953	27.727	0.111285714	1.14644898	0.91655102	6.1327
361	7/27/2016	26.9	28.853	30.558	30.016	29.9936875	28.37660417	29.32320833	26.195	28.953	26.891	0.111285714	1.222081633	0.929387755	6.3619
362	7/28/2016	27.1	29.652	30.255	29.54	29.92222917	28.49520833	27.99332292	26.977	28.754	24.219	0.111285714	1.29977551	0.94222449	6.6052
363	7/29/2016	26.8	29.053	30.963	29.215	30.10583333	28.0704375	27.55244792	25.416	28.357	24.026	0.111285714	1.381591837	0.955061224	6.8533
364	7/30/2016	25.8	28.357	30.659	29.815	29.98347917	26.7896875	28.4281875	24.448	29.053	23.112	0.111285714	1.451020408	0.970204082	7.0768
365	7/31/2016	26	29.652	30.255	30.243	29.98883333	28.97272917	29.52384375	27.961	29.752	27.407	0.11177551	1.510122449	0.984306122	7.3111
366	8/1/2016	26.8	30.154	30.356	30.444	29.72560417	29.53852083	30.00057292	28.754	29.252	29.065	0.112265306	1.563040816	0.997897959	7.3111
367	8/2/2016	26.7	29.853	30.457	30.369	30.3098125	29.46260417	28.23091667	28.357	29.752	22.345	0.115306122	1.615959184	1.021	7.3111
368	8/3/2016	26.9	30.255	30.558	30.596	30.356	28.8228125	28.4186875	25.902	30.154	20.936	0.118346939	1.681265306	1.044102041	7.3111
369	8/4/2016	27.1	29.452	30.862	29.565	30.4111875	28.21883333	28.22394792	24.255	29.252	25.55	0.121387755	1.746571429	1.067204082	7.5099
370	8/5/2016	27	29.352	30.963	27.677	30.75608333	28.31227083	25.91803125	26.977	30.457	20.889	0.124428571	1.813938776	1.090306122	7.7148
371	8/6/2016	26.5	29.552	30.76	28.444	30.53277083	28.26697917	27.31994792	24.931	30.054	25.016	0.127469388	1.891612245	1.113408163	7.8996
372	8/7/2016	25.9	29.752	30.76	30.243	30.369	28.74047917	28.8991875	26.879	29.352	25.768	0.130020408	1.973408163	1.130102041	8.0842
373	8/8/2016	25.9	29.152	30.558	29.49	30.28677083	27.76083333	28.55295833	25.708	29.752	27.259	0.132571429	2.067591837	1.141918367	8.2423
374	8/9/2016	25.8	29.652	31.064	29.165	30.5140625	28.07383333	27.955375	25.319	30.054	24.919	0.132571429	2.174183673	1.14422449	8.4081
375	8/10/2016	26.1	28.953	31.166	29.916	30.6571875	28.12347917	28.15880208	26.195	30.356	24.944	0.132571429	2.28077551	1.155530612	8.5759
376	8/11/2016	26.2	29.352	30.862	30.571	30.5205	28.80677083	29.45480208	27.272	29.552	28.196	0.132571429	2.377040816	1.166836735	8.729
377	8/12/2016	26.4	28.853	30.457	29.69	30.35602083	28.06072917	28.08594792	27.173	30.054	23.04	0.132571429	2.463	1.178142857	8.729
378	8/13/2016	26.8	28.159	30.255	28.965	30.0328125	27.5279375	28.30683333	27.075	29.853	27.087	0.132571429	2.536102041	1.187142857	8.729
379	8/14/2016	27.2	27.961	29.953	29.29	29.3418125	27.60789583	28.34686458	26.977	28.456	26.036	0.132571429	2.600469388	1.196142857	8.729
380	8/15/2016	27.6	27.961	29.652	29.365	29.49991667	27.56266667	29.00915625	27.272	29.252	27.899	0.132571429	2.64577551	1.205142857	8.729
381	8/16/2016	27.9	28.258	29.552	29.215	29.44783333	27.8933125	28.98271875	27.468	29.352	28.27	0.132571429	2.669938776	1.214142857	8.729
382	8/17/2016	27.9	27.961	29.452	29.29	29.3895	26.9701875	28.98171875	24.158	29.352	28.394	0.132571429	2.679163265	1.214142857	8.729
383	8/18/2016	27.7	26.683	29.352	29.015	29.20620833	26.10802083	28.7281875	24.448	29.053	28.097	0.132571429	2.681714286	1.214142857	8.729
384	8/19/2016	26.8	26.585	29.352	29.115	29.22289583	25.25716667	28.55233333	22.812	29.053	27.53	0.132571429	2.681714286	1.214142857	8.729
385	8/20/2016	26.6	27.764	30.054	29.29	29.42291667	25.94454167	28.72270833	24.545	29.152	27.358	0.132571429	2.68122449	1.214142857	8.729
386	8/21/2016	27.3	28.06	29.752	30.016	29.3708125	27.19889583	29.23696875	26.488	29.053	28.097	0.132571429	2.680734694	1.214142857	8.872
387	8/22/2016	27.1	28.357	29.752	30.066	29.40410417	27.61120833	29.48167708	26.097	28.953	28.048	0.132571429	2.680244898	1.214142857	9.0373
388	8/23/2016	26.6	28.258	30.054	29.515	29.49585417	27.51816667	28.88305208	26.195	29.053	26.598	0.132571429	2.679755102	1.214142857	9.1982
389	8/24/2016	26.8	28.456	29.953	29.69	29.72127083	27.4473125	28.75769792	25.319	29.053	26.646	0.132571429	2.679265306	1.214142857	9.362
390	8/25/2016	27	27.665	30.054	29.19	29.596125	26.66222917	27.32869792	24.835	29.152	24.146	0.132571429	2.67877551	1.214142857	9.5091
391	8/26/2016	26.2	28.258	30.054	28.617	29.8820625	27.43227083	27.30607292	25.902	29.552	24.508	0.132571429	2.691142857	1.214142857	9.6778
392	8/27/2016	25.6	28.655	30.76	29.84	29.94341667	28.22089583	28.93421875	27.862	29.452	26.598	0.132571429	2.723061224	1.214142857	9.8502
393	8/28/2016	25.8	28.754	31.064	29.815	30.24379167	27.6225	29.46283333	26.781	29.552	28.394	0.132571429	2.759591837	1.214142857	9.8502
394	8/29/2016	25.9	28.06	30.356	29.665	29.37579167	27.5321875	28.881375	27.075	28.754	27.579	0.132571429	2.796122449	1.214142857	9.8502
395	8/30/2016	25.9	28.853	29.652	29.715	29.48741667	28.1741875	28.99294792	27.567	29.152	26.451	0.132571429	2.835204082	1.214142857	9.8502
396	8/31/2016	25.8	29.652	30.255	29.59	29.761125	28.89320833	28.76555208	28.555	29.452	25.671	0.132571429	2.876836735	1.214142857	9.8502
397	9/1/2016	25.9	29.152	30.255	29.615	29.92391667	28.75235417	28.40033333	27.961	29.552	24.798	0.132571429	2.918469388	1.214142857	9.8502
398	9/2/2016	26	28.754	29.953	28.394	29.727375	28.2698125	27.06345833	26.292	29.352	24.315	0.132571429	2.947244898	1.214142857	9.8502
399	9/3/2016	26.6	28.655	29.752	27.702	29.64158333	27.689375	26.605	26	29.452	25.186	0.132571429	2.956959184	1.214142857	9.8502
400	9/4/2016	27.3	29.152	29.552	28.816	29.49783333	28.25864583	28.09308333	26.585	29.152	25.987	0.132571429	2.962061224	1.214142857	9.8502
401	9/5/2016	27.8	28.754	29.552	28.468	29.44783333	28.44608333	27.80079167	27.665	29.352	25.355	0.132571429	2.967163265	1.214142857	9.8502
402	9/6/2016	27.7	28.655	29.652	28.419	29.4895	28.44575	27.732	27.961	29.352	25.428	0.132571429	2.969714286	1.214142857	9.8502
403	9/7/2016	26	28.159	29.552	28.32	29.47283333	27.731875	27.32269792	25.61	29.352	24.677	0.132571429	2.969714286	1.214142857	9.8502
404	9/8/2016	26.2	27.665	29.552	28.245	29.44991667	26.9511875	26.98126042	26.097	29.252	25.089	0.132571429	2.969714286	1.214142857	9.8502
405	9/9/2016	26.2	27.468	29.953	29.464	29.49802083	27.01620833	28.4631875	25.708	29.152	27.407	0.132571429	2.976387755	1.214142857	9.8502
406	9/10/2016	25.6	28.655	30.457	29.315	29.89677083	27.43220833	28.62129167	26.585	29.552	25.695	0.132571429	2.98355102	1.214142857	9.8502
407	9/11/2016	25.4	28.853	30.154	29.79	29.70239583	27.967125	29.13897917	26.488	29.152	26.769	0.132571429	2.997387755	1.214142857	9.8502
408	9/12/2016	25.3	28.853	30.457	30.117	29.91170833	27.84310417	29.19430208	25.708	29.552	27.014	0.132571429	3.011714286	1.214142857	9.8502
409	9/13/2016	25.5	28.655	30.154	29.79	29.79222917	28.49547917	29.37838542	28.258	29.552	27.85	0.132571429	3.026040816	1.214142857	9.6634
410	9/14/2016	25.7	28.555	29.752	28.816	28.41885417	28.01920833	28.12276042	27.37	26.781	27.333	0.132571429	3.040367347	1.200510204	9.4599
411	9/15/2016	26	28.159	29.053	28.419	28.72520833	27.88077083	27.87763542	27.468	28.06	24.944	0.132571429	3.054693878	1.178918367	9.2537
412	9/16/2016	26.3	28.258	29.252	28.816	28.82445833	27.967375	27.6326875	27.764	28.555	24.605	0.132571429	3.05155102	1.149367347	9.0007
413	9/17/2016	26.4	28.159	29.053	28.147	28.9155	27.39614583	27.15372917	25.319	28.853	25.623	0.132571429	3.037122449	1.108244898	8.7706
414	9/18/2016	26.5	28.258	29.152	27.628	28.89670833	26.73404167	26.90127083	25.319	28.853	25.963	0.132571429	3.009346939	1.067122449	8.556
415	9/19/2016	26.6	28.06	29.053	28.171	28.847	27.58947917	27.65508333	27.173	28.655	25.793	0.132571429	2.974408163	1.013387755	8.3113
416	9/20/2016	26.3	27.862	28.853	28.841	28.59464583	27.70822917	28.12992708	27.468	28.357	26.256	0.132571429	2.926612245	0.942918367	8.0666
417	9/21/2016	26.1	27.764	28.655	28.518	28.49952083	27.55654167	28.26155208	27.272	28.258	28.023	0.132571429	2.863877551	0.875020408	7.8644
418	9/22/2016	26.2	28.258	29.352	28.717	28.7875	27.89775	28.08426042	27.468	28.456	25.987	0.132571429	2.794469388	0.811244898	7.6617
419	9/23/2016	26.2	28.456	29.152	28.916	28.87420833	28.229125	28.22079167	27.862	28.655	26.598	0.132571429	2.727122449	0.755428571	7.4996
420	9/24/2016	25.8	28.555	28.853	29.19	28.776625	28.3549375	28.43125	28.06	28.159	27.604	0.130020408	2.663897959	0.702714286	7.288
421	9/25/2016	25.9	28.953	29.452	28.866	28.94697917	28.6258125	28.45564583	28.258	28.456	27.186	0.127469388	2.604795918	0.639979592	7.0506
422	9/26/2016	26.2	29.452	29.853	28.941	29.41270833	29.08420833	28.47286458	28.456	28.953	26.965	0.112061224	2.551877551	0.580346939	6.8007
423	9/27/2016	26.6	29.252	29.853	29.015	29.33147917	28.7214375	28.12954167	27.764	28.953	26.622	0.096163265	2.511816327	0.525367347	6.5581
424	9/28/2016	26.6	28.06	29.053	28.468	28.88425	27.80075	27.93544792	27.468	28.853	26.622	0.080265306	2.482081633	0.480693878	6.3497
425	9/29/2016	25.8	27.764	29.053	29.14	28.81597917	27.22075	28.55708333	26.292	28.555	26.842	0.064367347	2.458530612	0.439857143	6.1772
426	9/30/2016	25.3	27.665	28.555	28.667	28.41475	27.12504167	28.35988542	25.708	28.258	27.653	0.048469388	2.443714286	0.399020408	6.1772
427	10/1/2016	25.1	27.862	28.357	28.27	28.2064375	27.56072917	28.05711458	26.683	28.06	27.308	0.035122449	2.435571429	0.366653061	6.1772
428	10/2/2016	25.1	28.159	28.655	28.419	28.33439583	27.7249375	27.99333333	27.37	28.06	26.671	0.02177551	2.429979592	0.344306122	6.1772
429	10/3/2016	25	28.357	28.655	28.468	28.39635417	27.6439375	27.69259375	25.222	28.159	25.234	0.021285714	2.424877551	0.331469388	6.1772
430	10/4/2016	25.4	28.258	29.352	28.345	28.5434375	27.83210417	27.5053125	26.195	28.159	23.93	0.021285714	2.41977551	0.330714286	6.1772
431	10/5/2016	25.7	28.357	28.853	28.295	28.466625	27.62291667	27.84426042	26.292	28.258	25.186	0.021285714	2.419285714	0.330714286	6.1772
432	10/6/2016	25.7	27.764	28.357	28.097	28.10745833	27.62204167	27.50610417	27.468	27.764	26.598	0.021285714	2.419285714	0.330714286	6.1772
433	10/7/2016	25.6	27.862	28.258	28.468	28.097125	27.75339583	28.18247917	27.567	27.961	27.924	0.021285714	2.419285714	0.330714286	6.1772
434	10/8/2016	25.6	28.258	28.258	28.122	28.1569375	27.9818125	27.90047917	27.764	28.06	27.727	0.021285714	2.419285714	0.330714286	6.018
435	10/9/2016	25.7	28.06	28.357	27.974	28.2146875	27.91779167	27.64833333	27.764	28.06	27.284	0.021285714	2.416734694	0.330714286	5.8411
436	10/10/2016	25.9	27.961	28.159	28.072	28.0373125	27.60166667	27.53340625	27.173	27.961	27.136	0.021285714	2.409571429	0.330714286	5.6782
437	10/11/2016	25.9	27.665	28.06	28.122	28.0538125	27.429375	27.48211458	27.272	27.961	25.939	0.021285714	2.393673469	0.330714286	5.4603
438	10/12/2016	25.9	28.06	28.258	27.751	28.0538125	27.65091667	27.24978125	27.272	27.961	26.695	0.021285714	2.36077551	0.330714286	5.2316
439	10/13/2016	25.5	27.862	28.357	27.727	28.1651875	27.70833333	27.26216667	27.567	28.06	26.109	0.021285714	2.312938776	0.330714286	5.0125
440	10/14/2016	25.8	27.961	28.853	28.122	28.51220833	27.74322917	27.43948958	27.468	28.06	25.914	0.021285714	2.258428571	0.330714286	4.7904
441	10/15/2016	26.3	28.06	28.853	28.543	28.6941875	27.80685417	28.21665625	27.567	28.655	27.431	0.021285714	2.188979592	0.330714286	4.5078
442	10/16/2016	26.6	28.06	28.655	28.444	28.57804167	27.87879167	28.20047917	27.764	28.456	27.801	0.021285714	2.107142857	0.323265306	4.232
443	10/17/2016	26.1	28.159	28.754	28.419	28.54920833	27.9549375	28.17548958	27.764	28.357	27.875	0.021285714	2.017061224	0.310428571	3.9798
444	10/18/2016	25.7	28.555	28.754	28.692	28.59264583	28.15704167	28.34441667	27.764	28.357	27.358	0.021285714	1.926979592	0.297591837	3.7175
445	10/19/2016	26	28.456	28.754	28.568	28.60697917	28.245625	27.30889583	28.06	28.555	24.46	0.021285714	1.851346939	0.284755102	3.4883
446	10/20/2016	26.3	28.258	28.655	27.751	28.37772917	28.171375	27.46044792	28.159	27.961	27.136	0.021285714	1.773653061	0.271918367	3.245
447	10/21/2016	26.5	28.555	28.754	28.345	28.58014583	28.3095625	27.97021875	28.159	28.357	26.867	0.021285714	1.691836735	0.259081633	2.9969
448	10/22/2016	26.4	28.555	28.853	28.468	28.60491667	28.26220833	28.04623958	27.567	28.456	27.677	0.021285714	1.622408163	0.243938776	2.7734
449	10/23/2016	25.5	28.06	28.953	27.727	28.75204167	27.84191667	26.48267708	27.468	28.655	24.002	0.020795918	1.563306122	0.243469388	2.5391
450	10/24/2016	24.9	28.357	29.053	NA	28.83247917	27.71091667	NA	26.683	28.754	23.93	0.020306122	1.510387755	NA	2.5391
451	10/25/2016	24.7	28.655	29.053	NA	28.8016875	28.36941667	NA	28.06	28.655	NA	0.017265306	1.457469388	NA	2.5391
452	10/26/2016	23.9	28.655	28.853	NA	28.6030625	28.32822917	NA	27.567	28.159	NA	0.01422449	1.392163265	NA	2.5391
453	10/27/2016	23.3	28.754	29.152	NA	28.80166667	28.43166667	NA	27.764	28.555	NA	0.011183673	1.326857143	NA	2.3403
454	10/28/2016	23.4	28.555	29.053	NA	28.67541667	28.06510417	NA	25.61	28.258	NA	0.008142857	1.259489796	NA	2.1354
455	10/29/2016	23.9	28.357	28.754	NA	28.45204167	28.130125	NA	27.961	28.159	NA	0.005102041	1.181816327	NA	1.9506
456	10/30/2016	24.3	27.961	28.258	NA	28.0765	27.6775625	NA	27.37	27.862	NA	0.00255102	1.100020408	NA	1.766
457	10/31/2016	24.5	27.665	28.159	NA	27.97160417	27.55035417	NA	27.37	27.567	NA	0	1.005836735	NA	1.6079
458	11/1/2016	24.5	27.468	27.961	NA	27.79247917	27.3801875	NA	26.879	27.468	NA	0	0.899244898	NA	1.4421
459	11/2/2016	24.1	27.37	27.665	NA	27.19802083	27.1180625	NA	26.879	26.879	NA	0	0.792653061	NA	1.2743
460	11/3/2016	23.5	27.173	27.567	NA	26.79366667	26.99945833	NA	26.683	26.39	NA	0	0.696387755	NA	1.1212
461	11/4/2016	23.4	27.272	27.961	NA	27.452375	27.015875	NA	26.683	26.781	NA	0	0.610428571	NA	1.1212
462	11/5/2016	23.2	27.567	28.159	NA	27.74125	27.30229167	NA	27.075	27.567	NA	0	0.537326531	NA	1.1212
463	11/6/2016	23.5	27.567	27.764	NA	27.616	27.3495	NA	27.173	27.468	NA	0	0.472959184	NA	1.1212
464	11/7/2016	24.1	27.37	27.665	NA	27.46410417	27.24922917	NA	27.075	27.37	NA	0	0.427653061	NA	1.1212
465	11/8/2016	24.2	27.468	27.862	NA	27.60979167	27.26558333	NA	27.075	27.37	NA	0	0.403489796	NA	1.1212
466	11/9/2016	24.2	27.173	27.665	NA	27.33735417	26.90758333	NA	26.683	27.075	NA	0	0.394265306	NA	1.1212
467	11/10/2016	23.9	26.781	27.272	NA	26.922	26.56283333	NA	26.292	26.39	NA	0	0.391714286	NA	1.1212
468	11/11/2016	21.8	26.683	27.567	NA	27.11622917	26.3045625	NA	25.902	26.781	NA	0	0.391714286	NA	1.1212
469	11/12/2016	22	26.879	27.272	NA	26.7609375	26.577375	NA	26.292	26.39	NA	0	0.391714286	NA	1.1212
470	11/13/2016	22.7	26.879	27.37	NA	27.00575	26.76058333	NA	26.585	26.683	NA	0	0.391714286	NA	0.9782
471	11/14/2016	23.3	26.977	27.764	NA	27.43560417	26.75854167	NA	26.585	26.977	NA	0	0.391714286	NA	0.8129
472	11/15/2016	22.8	26.879	27.567	NA	27.45589583	26.713625	NA	26.585	27.37	NA	0	0.391714286	NA	0.652
473	11/16/2016	21.8	26.781	27.468	NA	27.34341667	26.626	NA	26.488	27.173	NA	0	0.391714286	NA	0.4882
474	11/17/2016	22	26.683	27.37	NA	27.24308333	26.577125	NA	26.39	27.075	NA	0	0.391714286	NA	0.3411
475	11/18/2016	22.01333333	26.585	27.272	NA	27.14035417	26.45304167	NA	26.292	26.977	NA	0	0.378857143	NA	0.1724
476	11/19/2016	22.02666667	26.683	27.272	NA	27.1301875	26.50179167	NA	26.292	27.075	NA	0	0.346938776	NA	0
477	11/20/2016	22.04	26.781	27.173	NA	27.056625	26.5589375	NA	26.39	26.879	NA	0	0.310408163	NA	0
478	11/21/2016	22.05333333	26.683	27.075	NA	26.860625	26.46935417	NA	26.195	26.683	NA	0	0.273877551	NA	0
479	11/22/2016	22.06666667	26.488	26.977	NA	26.860625	26.37375	NA	26.195	26.683	NA	0	0.234795918	NA	0
480	11/23/2016	22.08	26.39	27.075	NA	26.80754167	26.19683333	NA	25.902	26.683	NA	0	0.193163265	NA	0
481	11/24/2016	22.09333333	26	26.879	NA	26.63222917	25.726	NA	25.319	26.292	NA	0	0.151530612	NA	0
482	11/25/2016	22.10666667	25.805	26.488	NA	26.13795833	25.54358333	NA	25.222	25.708	NA	0	0.122755102	NA	0
483	11/26/2016	22.12	26.488	26.39	NA	26.15197917	26.25797917	NA	25.61	26	NA	0	0.113040816	NA	0
484	11/27/2016	22.13333333	26.488	26.585	NA	26.4021875	26.01222917	NA	25.513	26.195	NA	0	0.107938776	NA	0
485	11/28/2016	22.14666667	25.805	26.195	NA	25.3880625	25.46660417	NA	24.931	24.931	NA	0	0.102836735	NA	0
486	11/29/2016	22.16	25.902	25.513	NA	24.80864583	25.5314375	NA	25.028	24.158	NA	0	0.100285714	NA	0
487	11/30/2016	22.17333333	26.195	26.097	NA	25.67158333	25.912625	NA	25.416	24.931	NA	0	0.100285714	NA	0
488	12/1/2016	22.18666667	26.488	26.683	NA	26.25597917	26.2253125	NA	26	25.805	NA	0	0.100285714	NA	0
489	12/2/2016	22.2	26	26.585	NA	25.78483333	25.69960417	NA	25.222	25.513	NA	0	0.093612245	NA	0
490	12/3/2016	22.1	26.097	26.488	NA	26.19075	25.76027083	NA	25.513	25.805	NA	0	0.08644898	NA	0
491	12/4/2016	21.9	26.39	26.683	NA	26.455	26.11964583	NA	25.805	26.292	NA	0	0.072612245	NA	0
492	12/5/2016	22	26.683	26.781	NA	26.59977083	26.44891667	NA	26.292	26.488	NA	0	0.058285714	NA	0
493	12/6/2016	22.6	26.488	26.683	NA	26.19704167	25.95325	NA	25.61	25.125	NA	0	0.043959184	NA	0
494	12/7/2016	22.1	25.902	25.61	NA	25.10514583	25.76047917	NA	25.61	24.641	NA	0	0.029632653	NA	0
495	12/8/2016	21	25.805	25.902	NA	25.68941667	25.71789583	NA	25.61	25.319	NA	0	0.015306122	NA	0
496	12/9/2016	19.6	25.708	25.805	NA	25.6895625	25.61035417	NA	25.416	25.513	NA	0	0.007653061	NA	0
497	12/10/2016	18.9	25.708	25.513	NA	25.11695833	25.42414583	NA	25.222	24.835	NA	0	0.000489796	NA	0
498	12/11/2016	19.4	25.513	25.902	NA	25.32554167	25.28060417	NA	25.125	24.738	NA	0	0	NA	0
499	12/12/2016	20.3	25.513	25.708	NA	25.302875	25.3614375	NA	25.125	24.931	NA	0	0	NA	0
500	12/13/2016	21.2	25.805	26.39	NA	25.861875	25.58402083	NA	25.416	25.513	NA	0	0	NA	0
501	12/14/2016	21.8	25.61	26.195	NA	25.83758333	25.52714583	NA	25.222	25.61	NA	0	0	NA	0
502	12/15/2016	22.3	25.222	26.097	NA	25.17570833	25.03214583	NA	24.738	24.835	NA	0	0	NA	0
503	12/16/2016	21.7	25.416	25.319	NA	24.20491667	24.91745833	NA	24.545	23.677	NA	0	0	NA	0
504	12/17/2016	20.6	25.416	25.222	NA	23.81189583	25.1735	NA	24.931	23.004	NA	0	0	NA	0
505	12/18/2016	20.7	25.708	25.319	NA	24.756125	25.59410417	NA	25.416	24.255	NA	0	0	NA	0
506	12/19/2016	21.4	26.097	25.708	NA	25.3473125	25.79483333	NA	25.513	25.028	NA	0	0	NA	0
507	12/20/2016	21.6	25.902	25.61	NA	25.46045833	25.83327083	NA	25.61	25.319	NA	0	0	NA	0
508	12/21/2016	20.3	25.805	25.513	NA	25.34729167	25.67322917	NA	25.513	25.125	NA	0	0	NA	0
509	12/22/2016	19.8	26.097	26	NA	25.56408333	25.91458333	NA	25.708	25.222	NA	0	0	NA	0
510	12/23/2016	19.2	25.805	25.708	NA	24.93010417	25.37779167	NA	24.931	23.966	NA	0	0	NA	0
511	12/24/2016	19.6	25.61	24.158	NA	23.66875	25.379625	NA	25.222	23.292	NA	0	0	NA	0
512	12/25/2016	20.3	25.61	25.028	NA	24.51675	25.44025	NA	25.222	23.581	NA	0	0	NA	0
513	12/26/2016	21.1	25.61	25.513	NA	25.06479167	25.44429167	NA	25.319	24.738	NA	0	0	NA	0
514	12/27/2016	21.6	25.416	25.319	NA	25.16960417	25.113125	NA	24.545	24.448	NA	0	0	NA	0
515	12/28/2016	21.8	24.835	24.931	NA	24.1509375	24.6251875	NA	24.448	23.388	NA	0	0	NA	0
516	12/29/2016	22.1	24.641	24.641	NA	24.3374375	24.458	NA	24.255	23.677	NA	0	0	NA	0
517	12/30/2016	22.4	24.545	24.351	NA	23.18820833	24.34133333	NA	24.062	22.717	NA	0	0	NA	0
518	12/31/2016	22.7	24.835	24.351	NA	23.71522917	24.58683333	NA	24.255	23.196	NA	0	0	NA	0
519	1/1/2017	22.9	24.931	24.448	NA	24.05614583	24.68766667	NA	24.448	23.581	NA	0	0	NA	0
520	1/2/2017	22.8	25.028	25.125	NA	24.50472917	24.78625	NA	24.545	23.869	NA	0	0	NA	0
521	1/3/2017	21.9	25.222	24.545	NA	24.1945	24.94154167	NA	24.738	23.869	NA	0	0	NA	0
522	1/4/2017	21.4	25.125	24.062	NA	23.89945833	24.92529167	NA	24.738	23.677	NA	0	0	NA	0
523	1/5/2017	21.6	25.222	24.255	NA	24.021875	24.97585417	NA	24.738	23.773	NA	0	0	NA	0
524	1/6/2017	21.8	25.125	24.448	NA	24.23658333	24.905125	NA	24.448	24.158	NA	0	0	NA	0
525	1/7/2017	21.1	25.222	24.448	NA	24.2910625	25.00204167	NA	24.835	24.158	NA	0	0	NA	0
526	1/8/2017	20.3	25.319	24.545	NA	24.25295833	25.00416667	NA	24.448	23.869	NA	0	0	NA	0
527	1/9/2017	20.1	25.125	24.158	NA	24.01185417	24.7056875	NA	24.448	23.773	NA	0	0	NA	0
528	1/10/2017	20.1	24.738	23.773	NA	23.50858333	24.574875	NA	24.351	23.1	NA	0	0	NA	0
529	1/11/2017	20.7	24.448	23.677	NA	23.33225	24.22466667	NA	24.062	23.004	NA	0	0	NA	0
530	1/12/2017	21.4	24.158	23.869	NA	23.58458333	24.098	NA	24.062	23.292	NA	0	0	NA	0
531	1/13/2017	21.7	24.255	23.677	NA	23.0709375	24.08808333	NA	23.869	22.333	NA	0	0	NA	0
532	1/14/2017	20.6	24.158	22.717	NA	22.41327083	23.993875	NA	23.869	21.951	NA	0	0	NA	0
533	1/15/2017	20.1	24.062	23.773	NA	22.49964583	23.965875	NA	23.869	21.76	NA	0	0	NA	0
534	1/16/2017	19.2	24.448	23.773	NA	23.44433333	24.03404167	NA	23.581	23.004	NA	0	0	NA	0
535	1/17/2017	18.8	24.448	23.581	NA	23.30808333	24.29091667	NA	24.062	23.004	NA	0	0	NA	0
536	1/18/2017	19.6	24.931	24.158	NA	23.85339583	24.55491667	NA	24.158	23.388	NA	0	0	NA	0
537	1/19/2017	19.8	25.222	25.028	NA	24.49058333	24.83685417	NA	24.351	23.869	NA	0	0	NA	0
538	1/20/2017	20.2	25.125	24.448	NA	24.32908333	24.69577083	NA	24.255	23.966	NA	0	0	NA	0
539	1/21/2017	20.7	24.545	23.966	NA	23.22422917	24.26083333	NA	24.062	22.812	NA	0	0	NA	0
540	1/22/2017	21.3	24.448	23.581	NA	23.298125	24.24260417	NA	23.966	23.004	NA	0	0	NA	0
541	1/23/2017	21.7	24.641	23.1	NA	22.61075	24.08420833	NA	23.773	22.046	NA	0	0	NA	0
542	1/24/2017	20.9	25.222	23.484	NA	22.50522917	24.85675	NA	24.351	21.855	NA	0	0	NA	0
543	1/25/2017	20.6	25.125	24.448	NA	23.42347917	24.9513125	NA	24.738	22.429	NA	0	0	NA	0
544	1/26/2017	20.1	25.222	24.448	NA	23.89958333	24.9535625	NA	24.641	23.484	NA	0	0	NA	0
545	1/27/2017	20	25.416	24.641	NA	23.56089583	25.23008333	NA	25.028	23.1	NA	0	0	NA	0
546	1/28/2017	20.4	25.902	24.158	NA	23.52054167	25.63277083	NA	25.222	23.1	NA	0	0	NA	0
547	1/29/2017	21.1	25.708	24.255	NA	23.817375	25.51908333	NA	25.416	23.484	NA	0	0	NA	0
548	1/30/2017	21.1	25.513	24.158	NA	23.89341667	25.34125	NA	24.835	23.677	NA	0	0	NA	0
549	1/31/2017	20.5	24.931	23.869	NA	23.2021875	24.70183333	NA	24.448	22.812	NA	0	0	NA	0
550	2/1/2017	20.6	25.125	23.773	NA	23.3983125	24.8709375	NA	24.738	22.717	NA	0	0	NA	0
551	2/2/2017	20.7	24.835	23.388	NA	22.93622917	24.5104375	NA	24.255	22.621	NA	0	0	NA	0
552	2/3/2017	19.7	25.222	23.869	NA	23.00864583	25.0381875	NA	24.738	22.333	NA	0	0	NA	0
553	2/4/2017	18.6	25.319	24.158	NA	23.8434375	24.94535417	NA	24.738	23.388	NA	0	0	NA	0
554	2/5/2017	18.3	25.319	24.255	NA	24.03383333	24.9616875	NA	24.448	23.773	NA	0	0	NA	0
555	2/6/2017	18.6	24.738	23.966	NA	23.77302083	24.45210417	NA	24.062	23.388	NA	0	0	NA	0
556	2/7/2017	19.2	24.255	23.677	NA	23.28622917	24.10222917	NA	23.966	22.812	NA	0	0	NA	0
557	2/8/2017	19.6	24.545	24.351	NA	24.025875	24.19275	NA	23.869	23.484	NA	0	0	NA	0
558	2/9/2017	20.5	24.448	24.158	NA	23.9034375	24.00189583	NA	23.388	23.388	NA	0	0	NA	0
559	2/10/2017	21.2	23.581	23.773	NA	23.44429167	23.42608333	NA	23.196	23.004	NA	0	0	NA	0
560	2/11/2017	21.6	23.869	24.158	NA	22.969	23.576625	NA	23.196	21.951	NA	0	0	NA	0
561	2/12/2017	21.6	24.641	24.062	NA	23.31466667	24.1045	NA	23.581	22.429	NA	0	0	NA	0
562	2/13/2017	22.1	24.351	24.351	NA	23.45675	24.1985	NA	24.062	22.717	NA	0	0	NA	0
563	2/14/2017	22.2	24.545	24.931	NA	24.25939583	24.29322917	NA	23.869	23.292	NA	0	0	NA	0
564	2/15/2017	22.5	24.545	24.835	NA	24.46608333	24.45810417	NA	24.351	24.158	NA	0	0	NA	0
565	2/16/2017	23.2	24.545	25.222	NA	24.7703125	24.48845833	NA	24.255	24.448	NA	0	0	NA	0
566	2/17/2017	22.3	24.641	25.319	NA	25.1431875	24.49833333	NA	24.351	24.931	NA	0	0	NA	0
567	2/18/2017	21.8	24.738	25.319	NA	25.13914583	24.45397917	NA	24.255	24.931	NA	0	0	NA	0
568	2/19/2017	21.8	24.545	25.125	NA	24.83258333	24.4016875	NA	24.158	24.641	NA	0	0	NA	0
569	2/20/2017	21.2	25.319	25.902	NA	25.22691667	25.08075	NA	24.545	24.545	NA	0	0	NA	0
570	2/21/2017	21.2	25.222	25.61	NA	25.12129167	24.85289583	NA	24.641	24.641	NA	0	0	NA	0
571	2/22/2017	21.9	25.222	25.708	NA	25.00864583	24.96577083	NA	24.641	24.448	NA	0	0	NA	0
572	2/23/2017	21.8	25.319	26	NA	25.72775	25.117	NA	24.835	25.513	NA	0	0	NA	0
573	2/24/2017	21	25.125	25.513	NA	25.1210625	24.78435417	NA	24.255	24.738	NA	0	0	NA	0
574	2/25/2017	21.5	25.513	25.708	NA	25.0045	25.199875	NA	24.835	24.448	NA	0	0	NA	0
575	2/26/2017	22.5	25.513	25.902	NA	25.580125	25.35335417	NA	25.028	25.222	NA	0	0	NA	0
576	2/27/2017	23.1	25.61	25.319	NA	24.79241667	25.325125	NA	24.835	24.351	NA	0	0	NA	0
577	2/28/2017	22.1	25.61	25.61	NA	24.8956875	25.4584375	NA	25.319	24.158	NA	0	0	NA	0
578	3/1/2017	21.2	25.805	26	NA	25.59616667	25.5030625	NA	25.125	25.416	NA	0	0	NA	0
579	3/2/2017	20.9	25.513	25.513	NA	25.17758333	25.185625	NA	24.931	24.835	NA	0	0	NA	0
580	3/3/2017	21.4	25.61	24.738	NA	24.40177083	25.27860417	NA	24.835	24.158	NA	0	0	NA	0
581	3/4/2017	22.3	25.61	25.513	NA	24.81479167	25.35941667	NA	25.028	24.158	NA	0	0	NA	0
582	3/5/2017	22.8	25.902	25.805	NA	25.57597917	25.5113125	NA	25.222	25.319	NA	0	0	NA	0
583	3/6/2017	23.3	25.513	25.708	NA	25.54545833	25.07495833	NA	24.545	25.319	NA	0	0	NA	0
584	3/7/2017	23	24.545	25.319	NA	24.86895833	24.41183333	NA	24.255	24.448	NA	0	0	NA	0
585	3/8/2017	21.5	24.545	24.641	NA	24.40775	24.27089583	NA	24.158	24.062	NA	0	0	NA	0
586	3/9/2017	21.6	24.931	25.61	NA	24.990625	24.5729375	NA	24.158	23.869	NA	0	0	NA	0
587	3/10/2017	22.4	25.513	25.805	NA	25.30954167	24.98816667	NA	24.545	24.738	NA	0	0	NA	0
588	3/11/2017	22.7	25.513	25.902	NA	25.72789583	25.27858333	NA	25.125	25.513	NA	0	0	NA	0
589	3/12/2017	23	25.513	25.805	NA	25.67733333	25.30485417	NA	25.028	25.61	NA	0	0	NA	0
590	3/13/2017	23.6	25.902	25.902	NA	25.6529375	25.40814583	NA	24.641	25.416	NA	0	0	NA	0
591	3/14/2017	24.2	25.61	25.708	NA	25.45664583	25.24220833	NA	24.931	24.931	NA	0	0	NA	0
592	3/15/2017	23.6	24.931	24.931	NA	24.32947917	24.7399375	NA	24.545	23.966	NA	0	0	NA	0
593	3/16/2017	23.9	25.513	25.222	NA	24.83277083	25.2968125	NA	24.835	24.158	NA	0	0	NA	0
594	3/17/2017	23.8	25.513	25.125	NA	25.05629167	25.29475	NA	25.028	24.931	NA	0	0	NA	0
595	3/18/2017	24.1	25.416	25.125	NA	25.0098125	25.2886875	NA	25.222	24.931	NA	0	0	NA	0
596	3/19/2017	23.2	25.416	25.416	NA	25.2644375	25.2705	NA	25.125	24.931	NA	0	0	NA	0
597	3/20/2017	22	25.805	26.39	NA	25.67958333	25.41822917	NA	25.125	25.319	NA	0	0	NA	0
598	3/21/2017	21.8	25.61	26.39	NA	26.25160417	25.24020833	NA	24.835	26.097	NA	0	0	NA	0
599	3/22/2017	22.1	25.319	26.097	NA	25.68341667	24.9860625	NA	24.448	25.416	NA	0	0	NA	0
600	3/23/2017	22.5	26.097	26.195	NA	25.8700625	25.46083333	NA	25.222	25.416	NA	0	0	NA	0
601	3/24/2017	23.3	25.708	25.902	NA	25.68335417	25.42010417	NA	25.028	25.416	NA	0	0	NA	0
602	3/25/2017	22.7	25.902	26.292	NA	25.99564583	25.59816667	NA	25.222	25.708	NA	0	0	NA	0
603	3/26/2017	21.7	25.319	25.902	NA	25.38202083	25.04625	NA	24.835	24.738	NA	0	0	NA	0
604	3/27/2017	21.4	25.125	24.835	NA	24.3498125	24.89714583	NA	24.545	23.581	NA	0	0	NA	0
605	3/28/2017	21.4	25.028	25.416	NA	25.14354167	24.81845833	NA	24.641	24.158	NA	0	0	NA	0
606	3/29/2017	22	25.125	25.319	NA	25.09677083	24.941375	NA	24.738	24.835	NA	0	0	NA	0
607	3/30/2017	22.9	25.125	25.319	NA	25.09670833	24.9555625	NA	24.738	24.931	NA	0	0	NA	0
608	3/31/2017	23.5	25.513	26	NA	25.56816667	25.02020833	NA	24.351	25.125	NA	0	0	NA	0
609	4/1/2017	24.1	24.641	25.708	NA	25.2766875	24.25489583	NA	23.869	24.835	NA	0	0	NA	0
610	4/2/2017	24.9	24.931	25.125	NA	24.70175	24.60716667	NA	24.158	24.351	NA	0	0	NA	0
611	4/3/2017	25.2	25.416	25.416	NA	24.94979167	24.951875	NA	24.351	24.545	NA	0	0	NA	0
612	4/4/2017	25.3	25.416	25.513	NA	24.96391667	24.99208333	NA	24.351	24.545	NA	0	0	NA	0
613	4/5/2017	24.5	25.513	25.319	NA	25.05858333	24.9881875	NA	24.448	24.738	NA	0	0	NA	0
614	4/6/2017	23	25.805	25.319	NA	25.13510417	25.4263125	NA	25.028	24.931	NA	0	0	NA	0
615	4/7/2017	23.1	25.708	25.416	NA	25.24422917	25.46654167	NA	25.319	25.125	NA	0	0	NA	0
616	4/8/2017	24.1	26	25.61	NA	25.4099375	25.33177083	NA	24.158	25.222	NA	0	0	NA	0
617	4/9/2017	25.1	26	26.292	NA	25.81529167	25.2870625	NA	24.641	25.416	NA	0	0	NA	0
618	4/10/2017	25.6	24.835	26.195	NA	26.0119375	24.57683333	NA	24.158	25.805	NA	0	0	NA	0
619	4/11/2017	25.7	25.319	26.292	NA	26.05052083	25.04029167	NA	24.448	25.708	NA	0	0	NA	0
620	4/12/2017	25.5	25.125	26.195	NA	25.44860417	24.9111875	NA	24.738	24.931	NA	0	0	NA	0
621	4/13/2017	25.6	24.835	25.416	NA	24.99804167	24.7319375	NA	24.641	24.448	NA	0	0	NA	0
622	4/14/2017	28	25.513	26.488	NA	25.62316667	25.0304375	NA	24.641	25.125	NA	0	0	NA	0
623	4/15/2017	27.9	26.097	27.567	NA	26.7329375	25.38225	NA	24.835	26	NA	0	0	NA	0
624	4/16/2017	28.6	26	26.879	NA	26.37989583	25.72591667	NA	25.319	26	NA	0	0	NA	0
625	4/17/2017	29.6	26.781	27.173	NA	26.45977083	25.85383333	NA	24.931	25.708	NA	0	0	NA	0
626	4/18/2017	29.6	25.222	27.567	NA	27.1591875	24.58916667	NA	23.677	26.781	NA	0	0	NA	0
627	4/19/2017	28.1	25.902	27.173	NA	26.91579167	25.10789583	NA	24.062	26.292	NA	0	0	NA	0
628	4/20/2017	28.2	25.805	27.764	NA	27.34764583	24.95847917	NA	23.388	26.879	NA	0	0	NA	0
629	4/21/2017	28.23333333	24.738	27.764	NA	27.29016667	23.75535417	NA	23.004	26.781	NA	0	0	NA	0
630	4/22/2017	28.26666667	25.125	27.468	NA	26.57477083	23.96108333	NA	23.1	25.708	NA	0	0	NA	0
631	4/23/2017	28.3	25.125	25.902	NA	25.41810417	24.93133333	NA	24.641	25.125	NA	0	0	NA	0
632	4/24/2017	29	26	26.879	NA	26.46141667	25.663125	NA	25.028	25.902	NA	0	0	NA	0
633	4/25/2017	29.5	26.879	26.683	NA	26.53252083	26.21333333	NA	25.416	26.39	NA	0	0	NA	0
634	4/26/2017	30.3	26.585	27.272	NA	26.70366667	26.43285417	NA	26.195	26.585	NA	NA	NA	NA	0
